# Supplementary material for: Construction of a genome instability-derived lncRNA-based risk scoring system for the prognosis of hepatocellular carcinoma
Source: Aging (Albany NY). 2021 Nov 18;13(22):24621–39. doi: 10.18632/aging.203698 (PMC8660619; doi:10.18632/aging.203698)
Supplement: Supplementary Data 2 [file aging-13-203698-s003.xlsx]

## Sheet: aging-21-012209-s003
Supplementary Data 2. 88 GILncRNAs.
lnc	conMean	treatMean	logFC	pValue	fdr
AP003119.1	0.499565	1.1074	1.14844	0.00053713	0.00515191
PRR26	1.21464	0.524063	-1.21272	0.00047689	0.00481129
AC116351.1	0.739925	0.154355	-2.26112	0.000105803	0.00205863
AC015922.2	1.06011	0.268951	-1.97881	8.67e-11	5.91e-08
LINC01480	0.810571	0.168488	-2.26629	0.0126225	0.0452419
LINC01151	1.63353	3.42348	1.06747	1.63e-06	0.000106946
SPINT1-AS1	2.10614	0.509828	-2.04652	0.00012091	0.00228722
AL691420.1	0.323082	1.47589	2.19161	4.36e-05	0.000942077
LINC02298	1.08985	0.480602	-1.18121	0.000259162	0.00343381
AC245041.2	1.1958	0.147979	-3.01451	0.00737957	0.0313941
AP000424.2	0.957522	0.369622	-1.37326	0.000349205	0.00405683
AL109917.1	0.27274	0.646098	1.24423	5.47e-07	5.48e-05
LINC01139	0.321127	0.904339	1.49372	9.48e-05	0.00187221
CASC9	1.04008	2.78649	1.42176	1.01e-06	8.59e-05
AL512353.1	0.272761	0.635043	1.21922	9.99e-06	0.00033191
Z82246.1	0.814875	1.75329	1.10541	0.0048219	0.023101
AP001271.1	0.633489	0.183117	-1.79055	0.00592711	0.0267145
LINC01608	0.542104	1.19561	1.1411	1.49e-05	0.000422758
AC010547.2	3.03377	0.283119	-3.42163	2.5e-06	0.000141974
AP001972.4	0.0287107	1.49451	5.70194	0.000902183	0.00718581
AC013275.1	1.4368	0.379109	-1.92218	0.000129641	0.0023233
AC090809.1	0.13774	0.739759	2.42511	1.93e-06	0.000119221
AL365226.1	0.0802888	0.814808	3.34319	0.00616968	0.0272828
LINC00221	0.508707	1.66305	1.70892	0.00138769	0.0100002
AL390719.2	0.660548	0.243263	-1.44115	0.000275403	0.00357163
AC016735.1	4.55115	0.847096	-2.42563	0.000201899	0.00295676
AC010205.1	0.317463	0.649002	1.03164	0.00292792	0.0169695
LINC02241	0.318498	1.10263	1.79159	1.58e-06	0.000106946
AC026462.3	2.18332	4.6423	1.08831	0.000829693	0.00684874
AP003119.2	0.983604	2.09856	1.09325	2.4e-07	3.52e-05
AC090015.1	0.37197	0.911059	1.29236	1.49e-05	0.000422758
AC007406.2	0.488158	1.78956	1.87419	0.00021315	0.00302406
LINC01639	0.192009	0.618975	1.6887	0.00810575	0.0329562
LINC02404	0.321351	0.932819	1.53745	1.66e-05	0.000460565
AP000424.1	1.1192	0.514444	-1.12138	0.00789353	0.0325374
LINC01419	2.36381	6.48897	1.45688	4.71e-06	0.000188626
MIR210HG	0.981768	2.07432	1.07919	0.00152643	0.0106615
LUCAT1	0.194437	0.803617	2.0472	0.00270756	0.0158953
AP001189.3	0.696267	0.202943	-1.77856	3.5e-08	5.96e-06
LINC02163	0.280085	1.40405	2.32566	4.42e-11	5.91e-08
AC079949.2	0.721979	1.45169	1.0077	0.0013996	0.0100329
BX649601.1	0.318292	0.822349	1.3694	0.00188226	0.0125058
MEG3	4.41906	1.66505	-1.40817	3.12e-06	0.000157201
LINC01857	0.837464	0.305889	-1.45302	0.00147402	0.0103485
AGAP2-AS1	2.40016	1.05166	-1.19046	1.42e-06	0.000106946
LINC01980	0.406528	2.32003	2.51272	2.26e-08	4.87e-06
PRRT3-AS1	1.05102	2.18043	1.05282	0.000201824	0.00295676
AC008035.1	1.26452	2.6903	1.08918	0.000151073	0.00244955
ST8SIA6-AS1	0.681824	2.7469	2.01033	3e-09	1.36e-06
AC096996.2	0.247048	0.631955	1.35503	0.000155578	0.00249292
LINC01124	1.98309	5.03962	1.34556	6.84e-05	0.0014549
AP000593.3	0.720826	2.03399	1.49659	0.0144096	0.0498454
KCNMB2-AS1	0.252816	1.04359	2.04539	4.31e-07	4.89e-05
LINC02476	0.179503	0.665703	1.89087	2.06e-06	0.000122068
AC015922.3	1.21311	0.516374	-1.23223	5.63e-07	5.48e-05
AC002456.1	0.657802	1.45578	1.14606	1.24e-05	0.000384762
PRKAR1B-AS2	2.86017	0.453063	-2.65832	0.001217	0.00905256
LINC00924	0.71606	0.284644	-1.33092	2.5e-08	4.87e-06
AC010643.1	0.295871	0.691884	1.22556	0.000358447	0.00405683
AC004540.1	0.792379	0.145279	-2.44737	0.00176004	0.0118774
UCA1	3.69045	0.100196	-5.2029	0.000201295	0.00295676
AC145343.1	0.430185	0.967943	1.16997	4.67e-06	0.000188626
AL355102.4	4.42849	1.80271	-1.29665	0.000420651	0.00447599
AC092490.1	0.430923	0.962402	1.15921	0.000111841	0.00214545
LINC01287	0.672504	3.55188	2.40097	0.00340986	0.0183566
AC254562.2	0.467288	1.0052	1.1051	0.00493735	0.0235128
LINC01474	1.15481	2.35162	1.02599	0.00119191	0.0089197
AP000757.2	1.15128	0.483972	-1.25025	4.05e-06	0.000184054
AC004080.2	0.28188	0.644243	1.19253	0.00199526	0.0129407
AC104083.1	2.77842	1.02095	-1.44435	8.14e-09	2.77e-06
AL035661.1	4.4436	2.07252	-1.10034	0.000147471	0.00241995
LINC02315	0.297369	0.959942	1.69069	0.000128869	0.0023233
HHIP-AS1	0.669291	0.220655	-1.60084	1.09e-05	0.000352443
AC016405.3	0.563488	1.16949	1.05343	0.000394618	0.00426563
AL731684.1	0.378848	0.844304	1.15614	0.00440214	0.0218603
AL162413.1	0.857553	5.26251	2.61745	7.14e-06	0.000258724
AC004540.2	1.30192	0.3517	-1.88823	0.000247795	0.00337497
AL023803.1	0.915028	2.147	1.23043	1.22e-05	0.000384762
AP003174.1	0.298448	0.615395	1.04403	0.00828852	0.0334817
AL512408.1	0.325157	0.658141	1.01726	3.67e-06	0.000178297
IGF2-AS	1.01029	0.479797	-1.07427	0.000750093	0.00644996
DCXR-DT	2.58161	5.56652	1.1085	0.000577882	0.00539093
BX640514.2	0.771251	0.150899	-2.35361	0.00122296	0.00905256
Z73429.1	0.276905	0.60199	1.12035	0.00601542	0.0267745
AC004862.1	1.05942	2.54471	1.26423	0.00265367	0.0156463
AL133355.1	0.650488	0.315158	-1.04545	4.48e-06	0.000188626
ZFPM2-AS1	0.552893	2.04878	1.88969	3.9e-05	0.000856687
LINC02506	0.920345	2.68925	1.54696	0.00100304	0.00789764
