# Supplementary material for: Construction of a genome instability-derived lncRNA-based risk scoring system for the prognosis of hepatocellular carcinoma
Source: publisher site journal article supplement (doi:10.18632/aging.203698), 2021-11-18
Supplement: Supplementary file [file aging-v13i22-203698-supplementary-material-SD1.pdf]

## SUPPLEMENTARY TABLES

**Supplementary Table 1. The common clinical features characteristic between the training set and testing set.**

| Variables | Type         | Total       | Test        | Train       | Pvalue |
|-----------|--------------|-------------|-------------|-------------|--------|
| Age       | <=65         | 216(62.97%) | 107(62.57%) | 109(63.37%) | 0.967  |
|           | >65          | 127(37.03%) | 64(37.43%)  | 63(36.63%)  |        |
| Gender    | FEMALE       | 110(32.07%) | 63(36.84%)  | 47(27.33%)  | 0.0763 |
|           | MALE         | 233(67.93%) | 108(63.16%) | 125(72.67%) |        |
| Grade     | G1-2         | 214(62.39%) | 106(61.99%) | 108(62.79%) | 1      |
|           | G3-4         | 124(36.15%) | 61(35.67%)  | 63(36.63%)  |        |
| Stage     | Stage I-II   | 238(69.39%) | 115(67.25%) | 123(71.51%) | 0.9667 |
|           | Stage III-IV | 83(24.2%)   | 41(23.98%)  | 42(24.42%)  |        |
| T         | T1-2         | 252(73.47%) | 126(73.68%) | 126(73.26%) | 0.9524 |
|           | T3-4         | 88(25.66%)  | 43(25.15%)  | 45(26.16%)  |        |
| M         | M0           | 245(71.43%) | 113(66.08%) | 132(76.74%) | 0.8991 |
|           | M1           | 3(0.87%)    | 2(1.17%)    | 1(0.58%)    |        |
| N         | N0           | 239(69.68%) | 111(64.91%) | 128(74.42%) | 0.9081 |
|           | N1-3         | 3(0.87%)    | 2(1.17%)    | 1(0.58%)    |        |

**Supplementary Table 2. Univariable Cox regression analysis.**

| Gene symbol | HR    | 95% CI      | P-value  |
|-------------|-------|-------------|----------|
| CASC9       | 1.068 | 1.012-1.126 | 0.017    |
| MIR210HG    | 1.157 | 1.062-1.261 | 9.90E-04 |
| LUCAT1      | 1.174 | 1.078-1.278 | 2.33E-04 |
| PRRT3-AS1   | 1.091 | 1.028-1.156 | 0.037    |
| KCNMB2-AS1  | 1.235 | 1.082-1.409 | 1.72E-03 |
| AC145343.1  | 1.378 | 1.072-1.772 | 0.012    |
| AL731684.1  | 1.141 | 1.037-1.255 | 0.007    |
| AC004862.1  | 0.811 | 0.683-0.964 | 0.017    |
| ZFPM2-AS1   | 1.148 | 1.095-1.204 | 1.14E-08 |
